# Supplementary material for: Increased cytotoxicity and streptolysin O activity in group G streptococcal strains causing invasive tissue infections
Source: Springer Nature journal article supplement (doi:10.1038/srep16945), 2015-11-25
Supplement: 41598_2015_BFsrep16945_MOESM1_ESM.pdf [file 41598_2015_BFsrep16945_MOESM1_ESM.pdf]

## Supplementary Material

### Increased cytotoxicity and streptolysin O activity in group G streptococcal strains causing invasive tissue infections

Nikolai Siemens<sup>1</sup>, Bård R. Kittang<sup>2,3</sup>, Bhavya Chakrakodi<sup>1</sup>, Oddvar Oppegaard<sup>4</sup>, Linda Johansson<sup>1</sup>, Trond Bruun<sup>3,4</sup>, INFECT Study Group, Mattias Svensson<sup>1</sup>, Steiner Skrede<sup>3,4</sup>, and Anna Norrby-Teglund<sup>1\*</sup>

**Table S1. Strains used in this study<sup>a</sup>**

| Disease category | Strain            | Site of isolation | Clinical syndrome     | Bacteremia | Sepsis | STSS | <i>emm</i> type  | <i>speG</i> <sup>dys</sup> |
|------------------|-------------------|-------------------|-----------------------|------------|--------|------|------------------|----------------------------|
| invasive         | 4F1 <sup>b</sup>  | Soft tissue       | NSTI                  | 0          | 1      | 0    | <i>stG6.3</i>    | 1                          |
|                  | 3NF5 <sup>b</sup> | Blood             | NSTI                  | 1          | 1      | 1    | <i>stG10.0</i>   | 1                          |
|                  | 3G7 <sup>b</sup>  | Blood             | NSTI                  | 1          | 1      | 1    | <i>stG2574.0</i> | 1                          |
|                  | S19 <sup>b</sup>  | Soft tissue       | NSTI                  | 0          | 1      | 0    | <i>stC74a.0</i>  | 1                          |
|                  | S76 <sup>b</sup>  | Soft tissue       | NSTI                  | 1          | 0      | 1    | <i>stG2078.0</i> | 0                          |
|                  | 5005 <sup>b</sup> | Soft tissue       | NSTI                  | 0          | 1      | 0    | <i>stG647.1</i>  | 1                          |
|                  | 6007 <sup>b</sup> | Soft tissue       | NSTI                  | 0          | 1      | 0    | <i>stG2078.2</i> | 0                          |
|                  | S7                | Blood             | Erysipelas/cellulitis | 1          | 0      | 0    | <i>stG643.1</i>  | 1                          |
|                  | S8                | Blood             | Erysipelas/cellulitis | 1          | 0      | 1    | <i>stG480.0</i>  | 1                          |
|                  | S9 <sup>b</sup>   | Blood             | Erysipelas/cellulitis | 1          | 1      | 0    | <i>stG6.5</i>    | 0                          |

|                    |             |                       |   |   |   |                   |   |
|--------------------|-------------|-----------------------|---|---|---|-------------------|---|
| S41                | Blood       | Erysipelas/cellulitis | 1 | 0 | 0 | <i>stG6.1</i>     | 0 |
| S47                | Blood       | Erysipelas/cellulitis | 1 | 0 | 0 | <i>stG485.0</i>   | 1 |
| S52                | Blood       | Erysipelas/cellulitis | 1 | 0 | 0 | <i>stG6.0</i>     | 1 |
| S53                | Blood       | Erysipelas/cellulitis | 1 | 0 | 0 | <i>stG652.0</i>   | 1 |
| S54                | Blood       | Erysipelas/cellulitis | 1 | 1 | 0 | <i>stC5345.1</i>  | 0 |
| S59                | Blood       | Erysipelas/cellulitis | 1 | 0 | 0 | <i>stG245.0</i>   | 0 |
| S60                | Blood       | Erysipelas/cellulitis | 1 | 1 | 0 | <i>stG480.0</i>   | 1 |
| S62                | Blood       | Erysipelas/cellulitis | 1 | 1 | 0 | <i>stG643.1</i>   | 1 |
| S70                | Blood       | Erysipelas/cellulitis | 1 | 1 | 0 | <i>stG643.0</i>   | 0 |
| S73                | Blood       | Erysipelas/cellulitis | 1 | 0 | 0 | <i>stG6.0</i>     | 1 |
| S88                | Blood       | Erysipelas/cellulitis | 1 | 0 | 0 | <i>stC74a.0</i>   | 1 |
| S90                | Blood       | Erysipelas/cellulitis | 1 | 1 | 0 | <i>stG485.0</i>   | 1 |
| S94                | Blood       | Erysipelas/cellulitis | 1 | 0 | 0 | <i>stG643.0</i>   | 0 |
| S98                | Blood       | Erysipelas/cellulitis | 1 | 1 | 0 | <i>stG485.0</i>   | 1 |
| S103               | Blood       | Erysipelas/cellulitis | 1 | 0 | 0 | <i>stG6.1</i>     | 0 |
| S106               | Blood       | Erysipelas/cellulitis | 1 | 0 | 0 | <i>stG652.0</i>   | 1 |
| S 114              | Blood       | Erysipelas/cellulitis | 1 | 0 | 0 | <i>stG652.0</i>   | 1 |
| S 115 <sup>b</sup> | Blood       | Erysipelas/cellulitis | 1 | 0 | 0 | <i>stG2078.0</i>  | 0 |
| S 117 <sup>b</sup> | Blood       | Erysipelas/cellulitis | 1 | 1 | 0 | <i>stG2078.0</i>  | 0 |
| S 118              | Soft tissue | Erysipelas/cellulitis | 0 | 1 | 0 | <i>stG10.0</i>    | 1 |
| S58                | Blood       | Spondylodiscitis      | 1 | 1 | 0 | <i>stG62647.0</i> | 1 |

|              |                  |                |                                    |   |   |   |                  |   |
|--------------|------------------|----------------|------------------------------------|---|---|---|------------------|---|
|              | S68              | Blood          | Wound infection, endocarditiis     | 1 | 0 | 0 | <i>stG6.0</i>    | 1 |
|              | S86              | Synovial fluid | Acute monoarthritis                | 0 | 0 | 0 | <i>stG643.1</i>  | 1 |
|              | S96              | Bone           | Spondylodiscitis, epidural abscess | 0 | 0 | 0 | <i>stG485.2</i>  | 1 |
|              | S97              | Blood          | Septic bursitits, endophtalmitis   | 1 | 1 | 0 | <i>stC74a.0</i>  | 1 |
|              | S102             | Blood          | Endocarditis                       | 1 | 1 | 0 | <i>stC74a.0</i>  | 1 |
|              | S20              | Blood          | Tenovaginitis                      | 1 | 0 | 0 | <i>stG6792.0</i> | 1 |
|              | S25              | Blood          | Wound infection                    | 1 | 0 | 1 | <i>stG485.0</i>  | 1 |
|              | S11              | Blood          | Acute monoarthritis                | 1 | 0 | 0 | <i>stG485.0</i>  | 1 |
|              | S57              | Blood          | Primary bacteremia                 | 1 | 1 | 0 | <i>stG5420.0</i> | 0 |
|              | S 121            | Blood          | Wound infection                    | 1 | 1 | 0 | <i>stG643.0</i>  | 0 |
|              | S 126            | Blood          | Wound infection                    | 1 | 1 | 0 | <i>stG643.0</i>  | 0 |
|              | S 128            | Blood          | Primary bacteremia                 | 1 | 1 | 0 | <i>stG10.0</i>   | 1 |
|              | S 130            | Blood          | Bacteremia                         | 1 | 1 | 0 | <i>stG643.0</i>  | 0 |
|              | S 131            | Blood          | Erysipelas/cellulitis              | 1 | 0 | 0 | <i>stG643.0</i>  | 1 |
|              | S 132            | Blood          | Primary bacteremia                 | 1 | 1 | 0 | <i>stG6.0</i>    | 1 |
|              | S 135            | Blood          | Inguinal abscess                   | 1 | 0 | 0 | <i>stG10.0</i>   | 1 |
|              | S 137            | Blood          | Erysipelas/cellulitis              | 1 | 1 | 0 | <i>stG643.1</i>  | 1 |
|              | S 138            | Blood          | Primary bacteremia                 | 1 | 1 | 0 | <i>stG485.0</i>  | 1 |
| non invasive | B8 <sup>b</sup>  | Skin           | Wound infection                    | 0 | 0 | 0 | <i>stG485.0</i>  | 1 |
|              | B9 <sup>b</sup>  | Skin           | Wound infection                    | 0 | 0 | 0 | <i>stG485.0</i>  | 1 |
|              | B10 <sup>b</sup> | Skin           | Wound infection                    | 0 | 0 | 0 | <i>stG6.0</i>    | 1 |

|                  |        |                 |   |   |   |                   |   |
|------------------|--------|-----------------|---|---|---|-------------------|---|
| B31 <sup>b</sup> | Skin   | Wound infection | 0 | 0 | 0 | <i>stG652.0</i>   | 1 |
| B35 <sup>b</sup> | Skin   | Wound infection | 0 | 0 | 0 | <i>stG480.0</i>   | 1 |
| B69              | Skin   | Wound infection | 0 | 0 | 0 | <i>stG10.0</i>    | 1 |
| B71              | Skin   | Wound infection | 0 | 0 | 0 | <i>stG643.0</i>   | 0 |
| B81              | Skin   | Wound infection | 0 | 0 | 0 | <i>stG6.7</i>     | 0 |
| B88              | Skin   | Wound infection | 0 | 0 | 0 | <i>stG643.1</i>   | 1 |
| B89              | Skin   | Wound infection | 0 | 0 | 0 | <i>stG6.0</i>     | 1 |
| B91              | Skin   | Wound infection | 0 | 0 | 0 | <i>stG62647.0</i> | 1 |
| B131             | Skin   | Wound infection | 0 | 0 | 0 | <i>stG6.0</i>     | 1 |
| B135             | Throat | Tonsillitis     | 0 | 0 | 0 | <i>stG6.1</i>     | 0 |
| B141             | Skin   | Wound infection | 0 | 0 | 0 | <i>stG6.4</i>     | 0 |
| B143             | Skin   | Impetigo        | 0 | 0 | 0 | <i>stG652.0</i>   | 1 |
| B153             | Skin   | Wound infection | 0 | 0 | 0 | <i>stG6.3</i>     | 0 |
| B163             | Skin   | Wound infection | 0 | 0 | 0 | <i>stG643.1</i>   | 1 |
| B196             | Skin   | Impetigo        | 0 | 0 | 0 | <i>stG485.0</i>   | 1 |

---

<sup>a</sup>, SDSE strain collection was previously published by Kittang et al. and Bruun et al <sup>1,2</sup> except strains 5005 and 6007. <sup>b</sup>, selected cohort

**Table S2. Proteins identified in >30 kDa fraction from 4F1 and B35 strains**

| Accession  | Title                                                                                                                                       | Score | MW    | Cover |
|------------|---------------------------------------------------------------------------------------------------------------------------------------------|-------|-------|-------|
| <b>4F1</b> |                                                                                                                                             |       |       |       |
| ENO_STRE4  | Enolase OS=Streptococcus equi subsp. equi (strain 4047) GN=eno PE=3 SV=1                                                                    | 317   | 47269 | 31.5  |
| SPG2_STRSG | Immunoglobulin G-binding protein G OS=Streptococcus sp. group G GN=spg PE=1 SV=1                                                            | 232   | 63253 | 13.3  |
| STRP_STREQ | Streptokinase C OS=Streptococcus dysgalactiae subsp. equisimilis GN=skc PE=1 SV=1                                                           | 196   | 50109 | 35.7  |
| G3P_STREQ  | Glyceraldehyde-3-phosphate dehydrogenase OS=Streptococcus dysgalactiae subsp. equisimilis GN=gap PE=3 SV=2                                  | 147   | 35962 | 41.4  |
| STRP_STRP1 | Streptokinase A OS=Streptococcus pyogenes serotype M1 GN=ska PE=4 SV=2                                                                      | 132   | 49894 | 20    |
| ALF_STRP3  | Fructose-bisphosphate aldolase OS=Streptococcus pyogenes serotype M3 (strain ATCC BAA-595 / MGAS315) GN=fba<br>PE=3 SV=1                    | 130   | 31302 | 34.1  |
| TACY_STREQ | Streptolysin O OS=Streptococcus dysgalactiae subsp. equisimilis GN=slo PE=3 SV=1                                                            | 126   | 64010 | 36.2  |
| M12_STRPY  | M protein, serotype 12 (Fragment) OS=Streptococcus pyogenes GN=emm12 PE=1 SV=1                                                              | 83    | 62866 | 5.9   |
| PAM_STRPY  | Plasminogen-binding group A streptococcal M-like protein PAM (Fragment) OS=Streptococcus pyogenes GN=pam PE=1<br>SV=1                       | 83    | 43603 | 8.5   |
| EFTS_STRP1 | Elongation factor Ts OS=Streptococcus pyogenes serotype M1 GN=tsf PE=3 SV=1                                                                 | 61    | 37204 | 11    |
| METE_STAHJ | 5-methyltetrahydropteroyltriglutamate--homocysteine methyltransferase OS=Staphylococcus haemolyticus (strain<br>JCSC1435) GN=metE PE=3 SV=1 | 51    | 85511 | 3.6   |
| EFTU_STRP8 | Elongation factor Tu OS=Streptococcus pyogenes serotype M18 (strain MGAS8232) GN=tuf PE=3 SV=1                                              | 45    | 43886 | 25.9  |
| PGK_STRA1  | Phosphoglycerate kinase OS=Streptococcus agalactiae serotype Ia (strain ATCC 27591 / A909 / CDC SS700) GN=pgk<br>PE=3 SV=1                  | 45    | 42088 | 16.3  |
| TIG_STRU0  | Trigger factor OS=Streptococcus uberis (strain ATCC BAA-854 / 0140J) GN=tig PE=3 SV=1                                                       | 41    | 47289 | 4.9   |

|            |                                                                                                                |     |       |      |
|------------|----------------------------------------------------------------------------------------------------------------|-----|-------|------|
| ATPA_STRT1 | ATP synthase subunit alpha OS=Streptococcus thermophilus (strain CNRZ 1066) GN=atpA PE=3 SV=1                  | 33  | 54617 | 3.4  |
| ACON_STRMU | Aconitate hydratase OS=Streptococcus mutans serotype c (strain ATCC 700610 / UA159) GN=acn PE=3 SV=2           | 33  | 98278 | 0.8  |
| <b>B35</b> |                                                                                                                |     |       |      |
| STRP_STRS1 | Streptokinase G OS=Streptococcus sp. (strain 19909) GN=skg PE=4 SV=1                                           | 410 | 50168 | 40.9 |
| SPG1_STRSG | Immunoglobulin G-binding protein G OS=Streptococcus sp. group G GN=spg PE=1 SV=1                               | 282 | 47538 | 19.6 |
| TACY_STREQ | Streptolysin O OS=Streptococcus dysgalactiae subsp. equisimilis GN=slo PE=3 SV=1                               | 254 | 64010 | 36.1 |
| ENO_STRE4  | Enolase OS=Streptococcus equi subsp. equi (strain 4047) GN=eno PE=3 SV=1                                       | 157 | 47269 | 23   |
| ALF_STRP1  | Fructose-bisphosphate aldolase OS=Streptococcus pyogenes serotype M1 GN=fba PE=3 SV=2                          | 156 | 31303 | 27.6 |
| G3P_STRP1  | Glyceraldehyde-3-phosphate dehydrogenase OS=Streptococcus pyogenes serotype M1 GN=gap PE=3 SV=2                | 135 | 36034 | 50.9 |
| PGK_STRP3  | Phosphoglycerate kinase OS=Streptococcus pyogenes serotype M3 (strain ATCC BAA-595 / MGAS315) GN=pgk PE=3 SV=1 | 78  | 42104 | 12.1 |
| EFTU_STRP8 | Elongation factor Tu OS=Streptococcus pyogenes serotype M18 (strain MGAS8232) GN=tuf PE=3 SV=1                 | 50  | 43886 | 31.7 |
| M12_STRPY  | M protein, serotype 12 (Fragment) OS=Streptococcus pyogenes GN=emm12 PE=1 SV=1                                 | 47  | 62866 | 2.8  |

---

MW, molecular weight

**Figure S1**

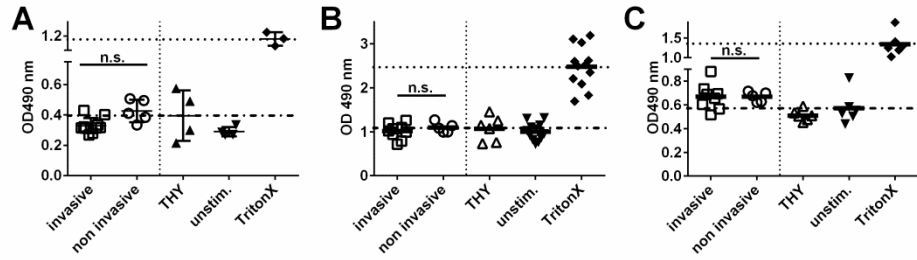

**Figure S1.** Cytotoxicity towards human primary fibroblasts (A), PBMCs (B), and PMNs (C). Human cells were stimulated with supernatants from selected cohort. The statistical significance between the two groups was determined using two-tailed Mann-Whitney U-test.

**Figure S2**

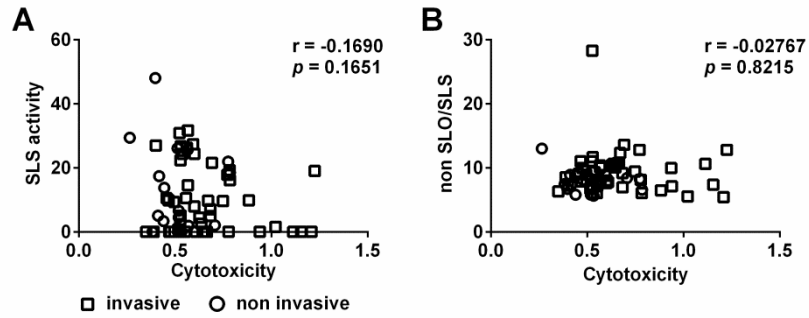

**Figure S2. Cytotoxicity towards N/TERT-1 cells.** (A) Correlation analyses of SLS and non SLO/SLS (B) mediated cytotoxicity towards human keratinocytes. Correlation was determined using Pearson test.



**Figure S3**

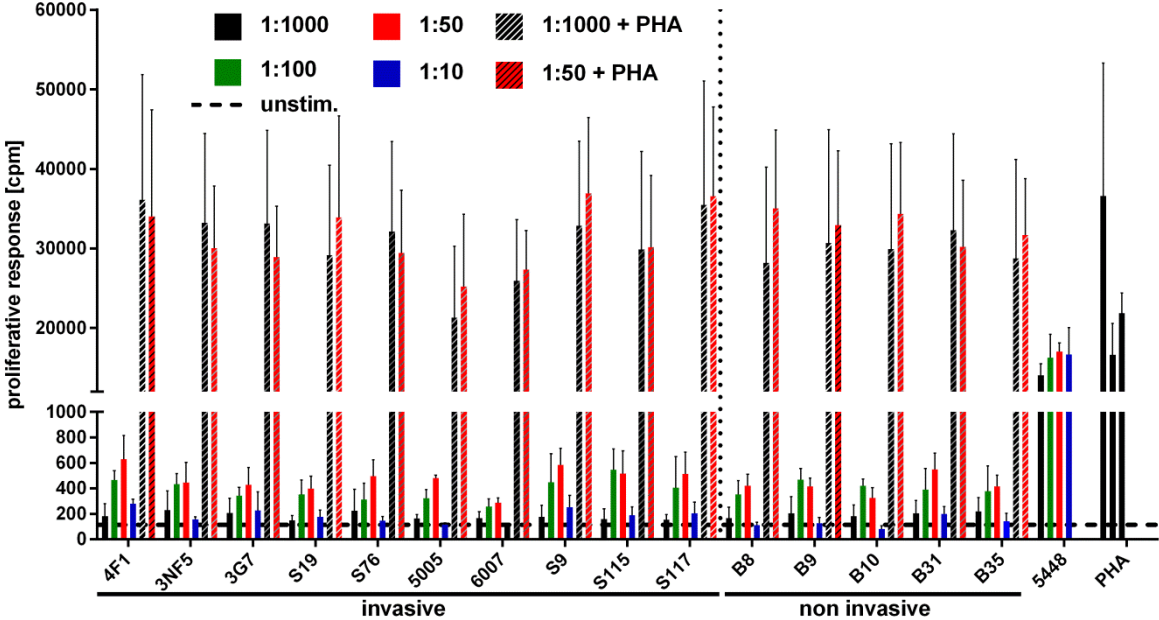

**Figure S3. T-cell proliferation in human PBMCs.** Proliferation was assessed by <sup>3</sup>H-thymidine uptake. Each bar represents the mean value ±SD from three donors.

## REFERENCES

- 1 Bruun, T. *et al.* Necrotizing soft tissue infections caused by *Streptococcus pyogenes* and *Streptococcus dysgalactiae* subsp. *equisimilis* of groups C and G in western Norway. *Clin Microbiol Infect* **19**, E545-550, doi:10.1111/1469-0691.12276 (2013).
- 2 Kittang, B. R. *et al.* Invasive group A, C and G streptococcal disease in western Norway: virulence gene profiles, clinical features and outcomes. *Clin Microbiol Infect* **17**, 358-364, doi:10.1111/j.1469-0691.2010.03253.x (2011).
